# Supplementary figures and images for: Auxeticity enhancement due to size polydispersity in fcc crystals of hard-core repulsive Yukawa particles
Source: Royal Society of Chemistry journal article supplement (doi:10.1039/c7sm01231d), 2017-01-01

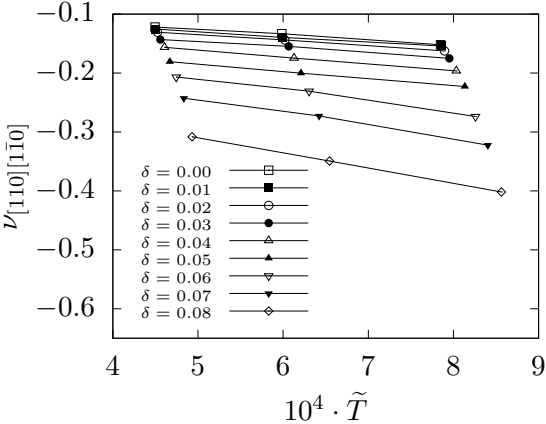

Supplement: c7sm01231d1.zip [file c7sm01231d1.zip]

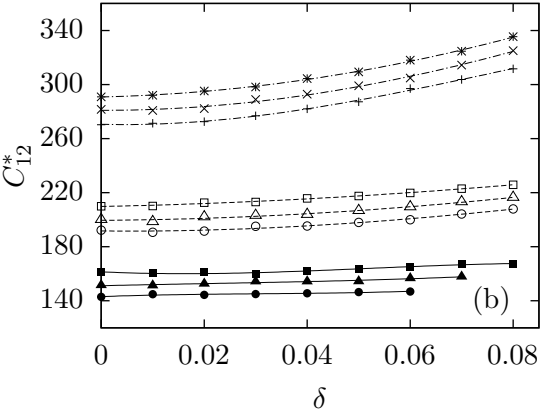

Supplement: c7sm01231d1.zip [file c7sm01231d1.zip]

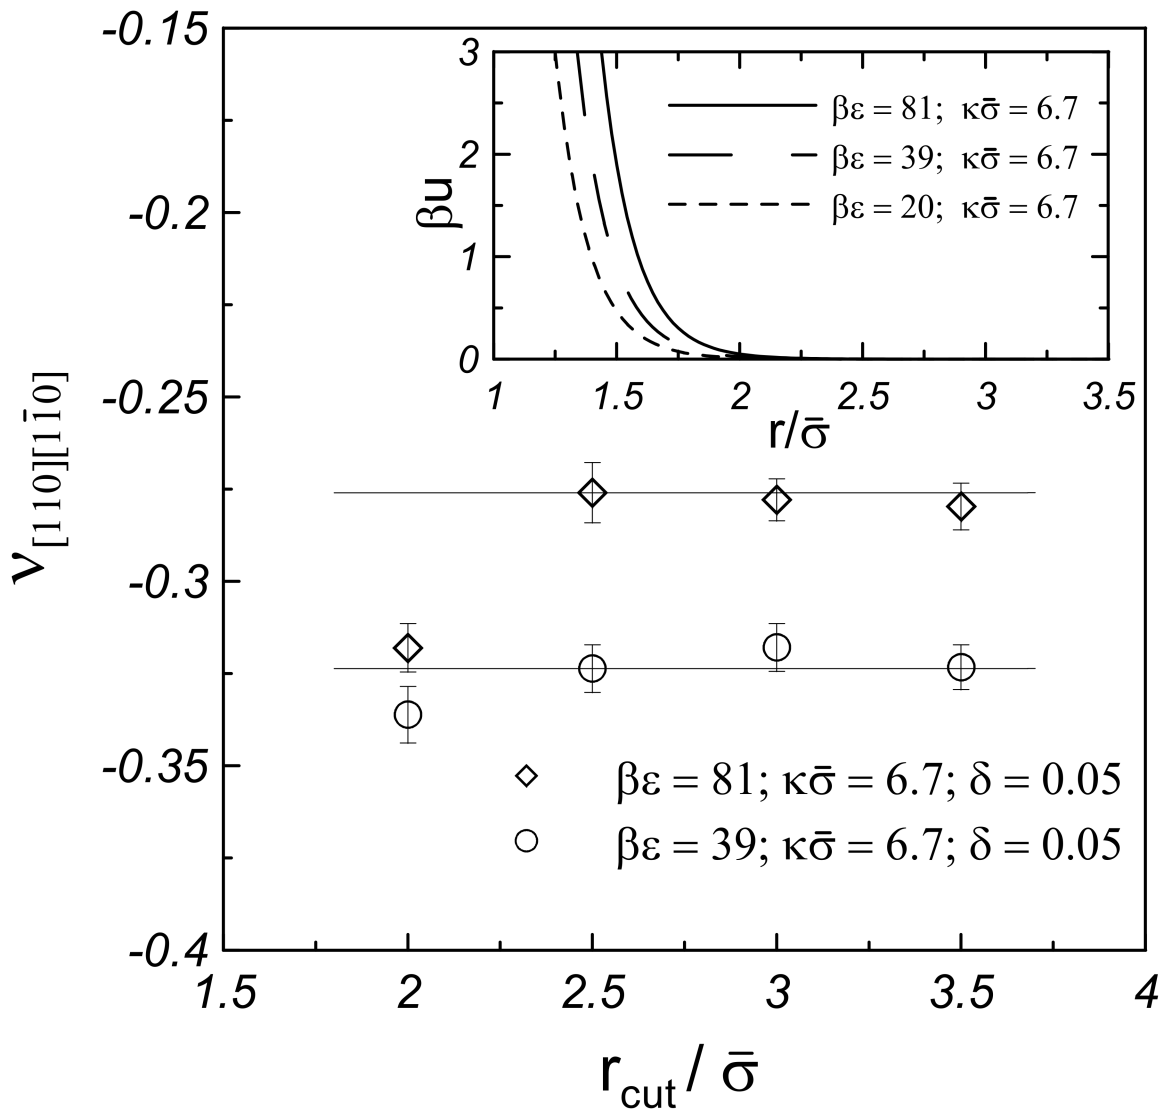

Supplement: c7sm01231d1.zip [file c7sm01231d1.zip]

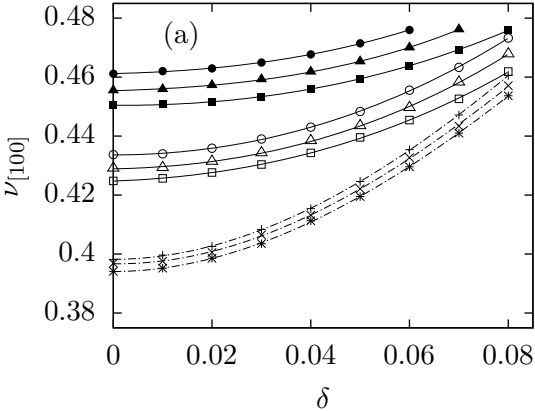

Supplement: c7sm01231d1.zip [file c7sm01231d1.zip]

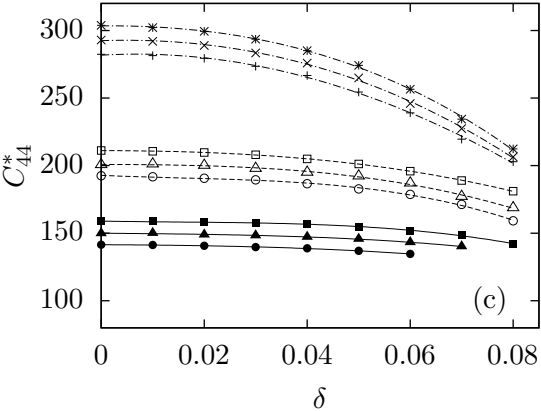

Supplement: c7sm01231d1.zip [file c7sm01231d1.zip]

# Ideal Auxetic

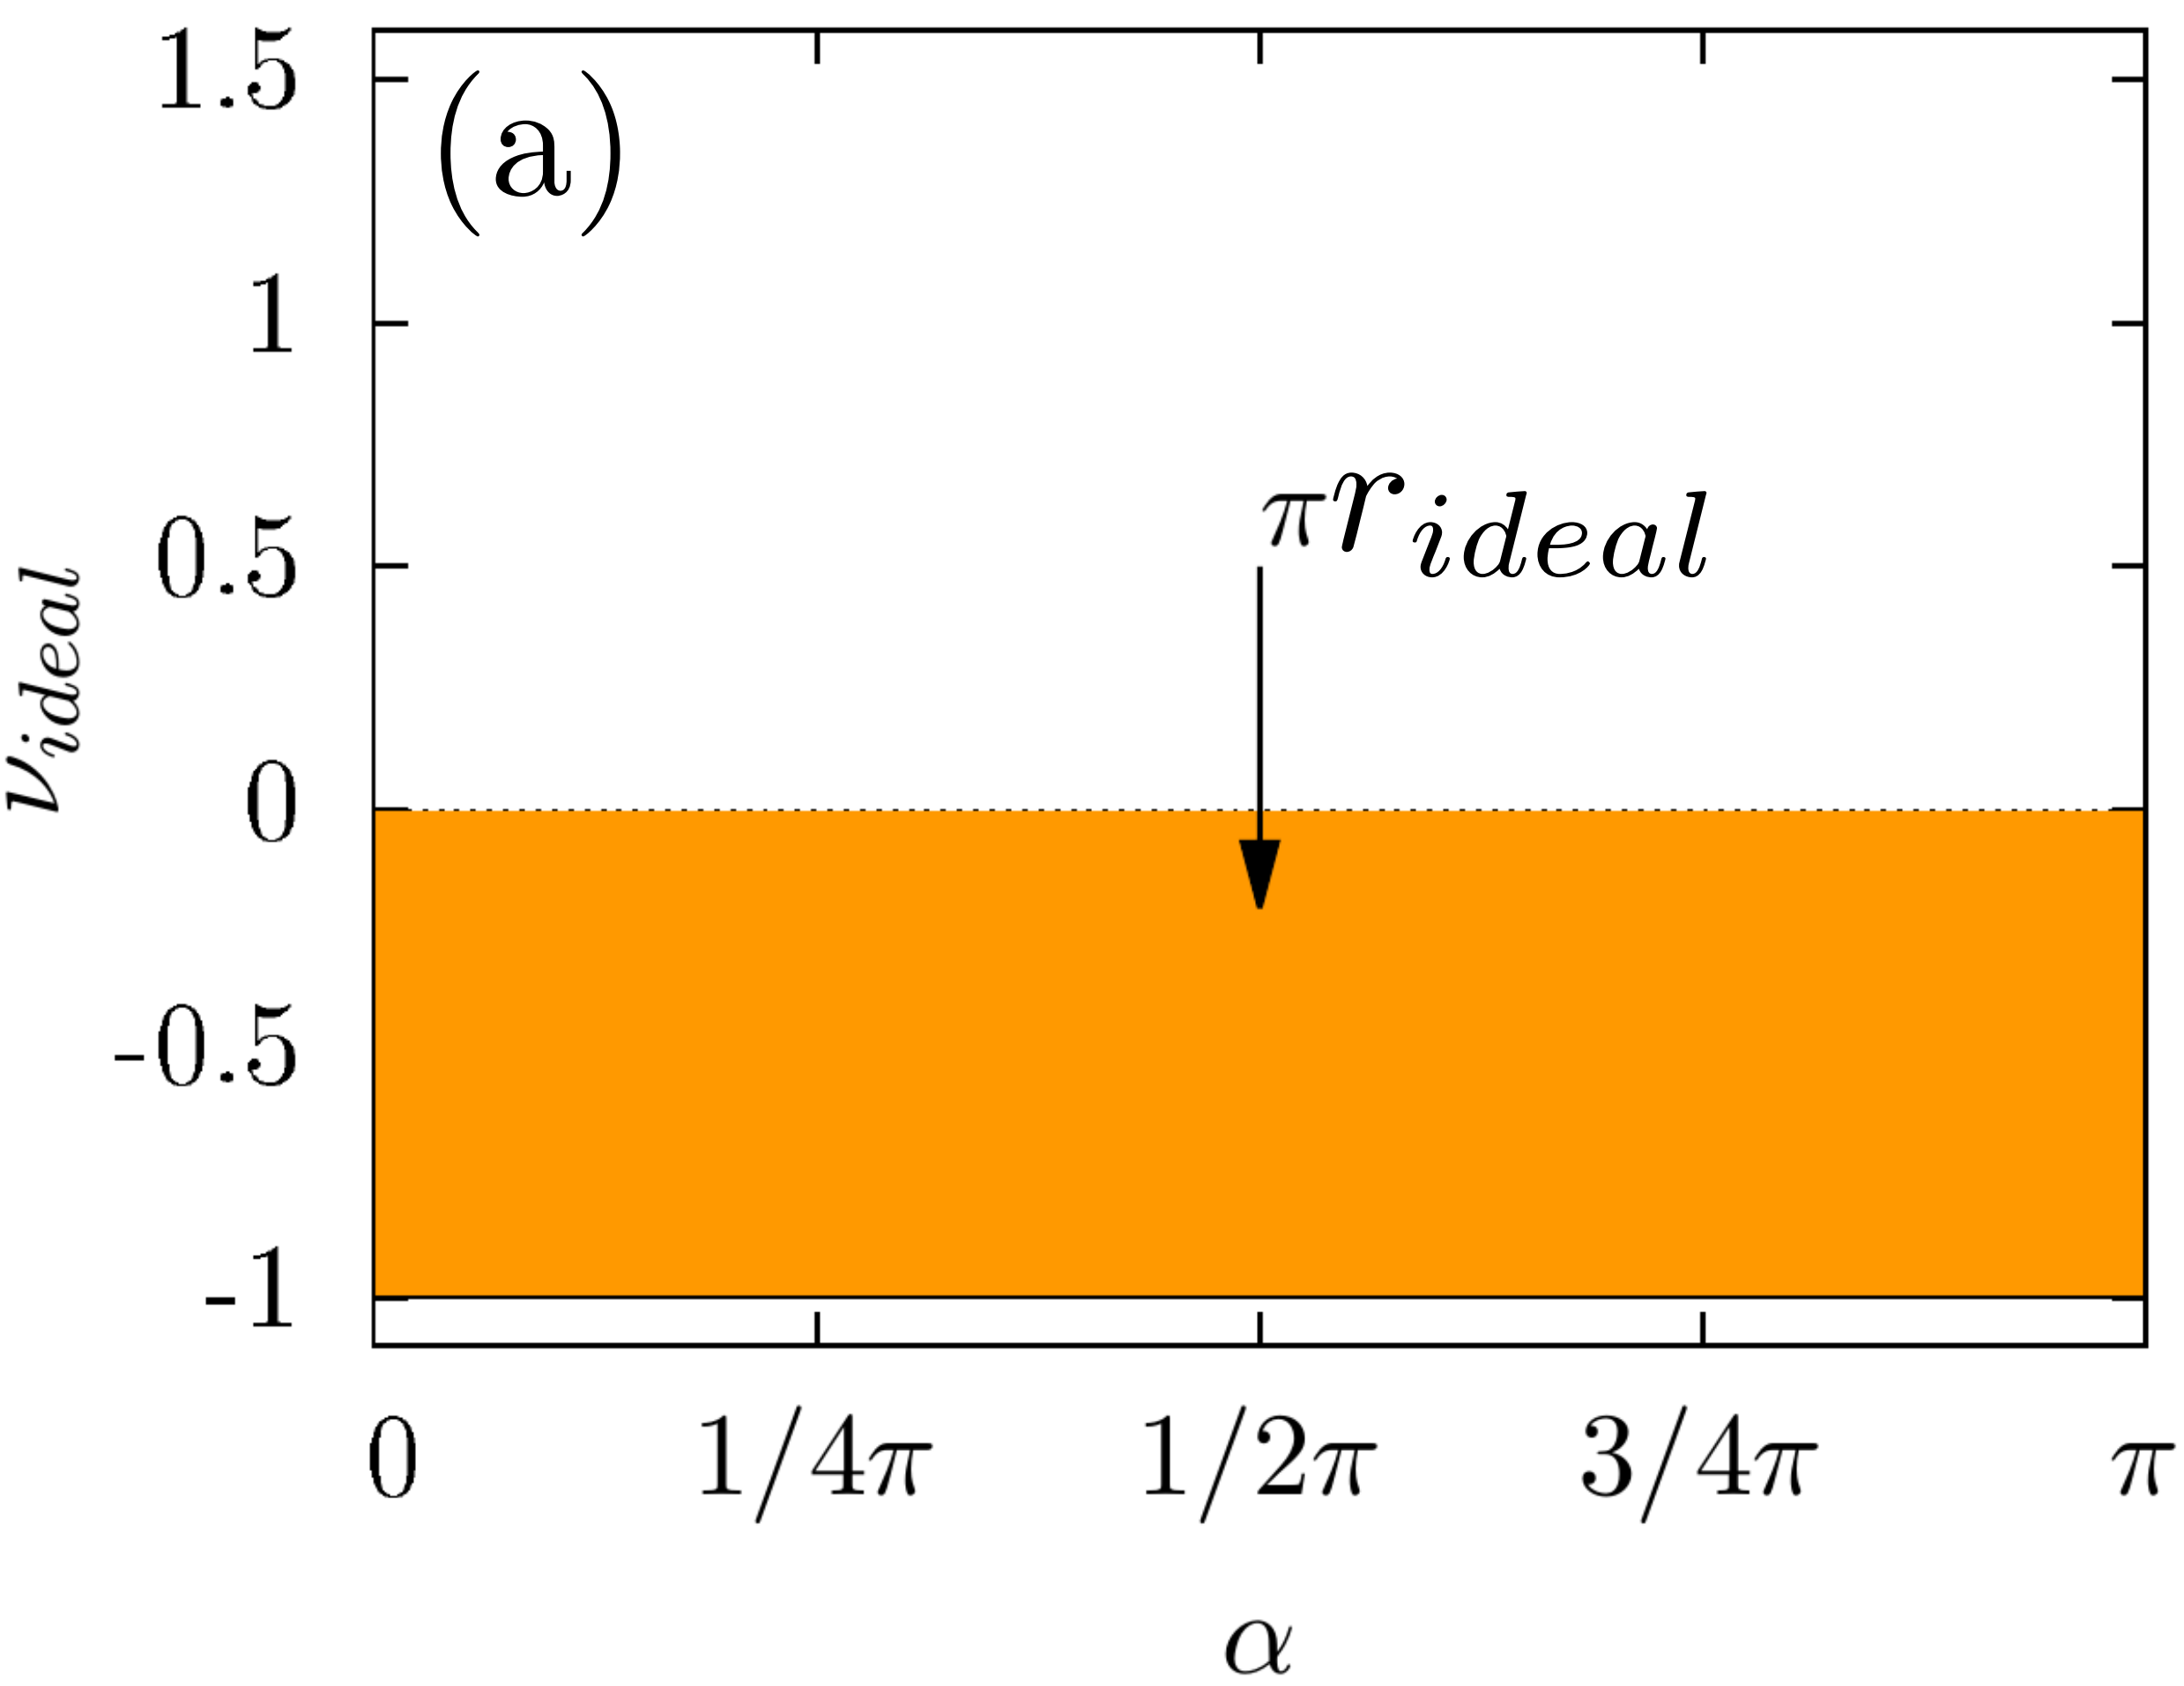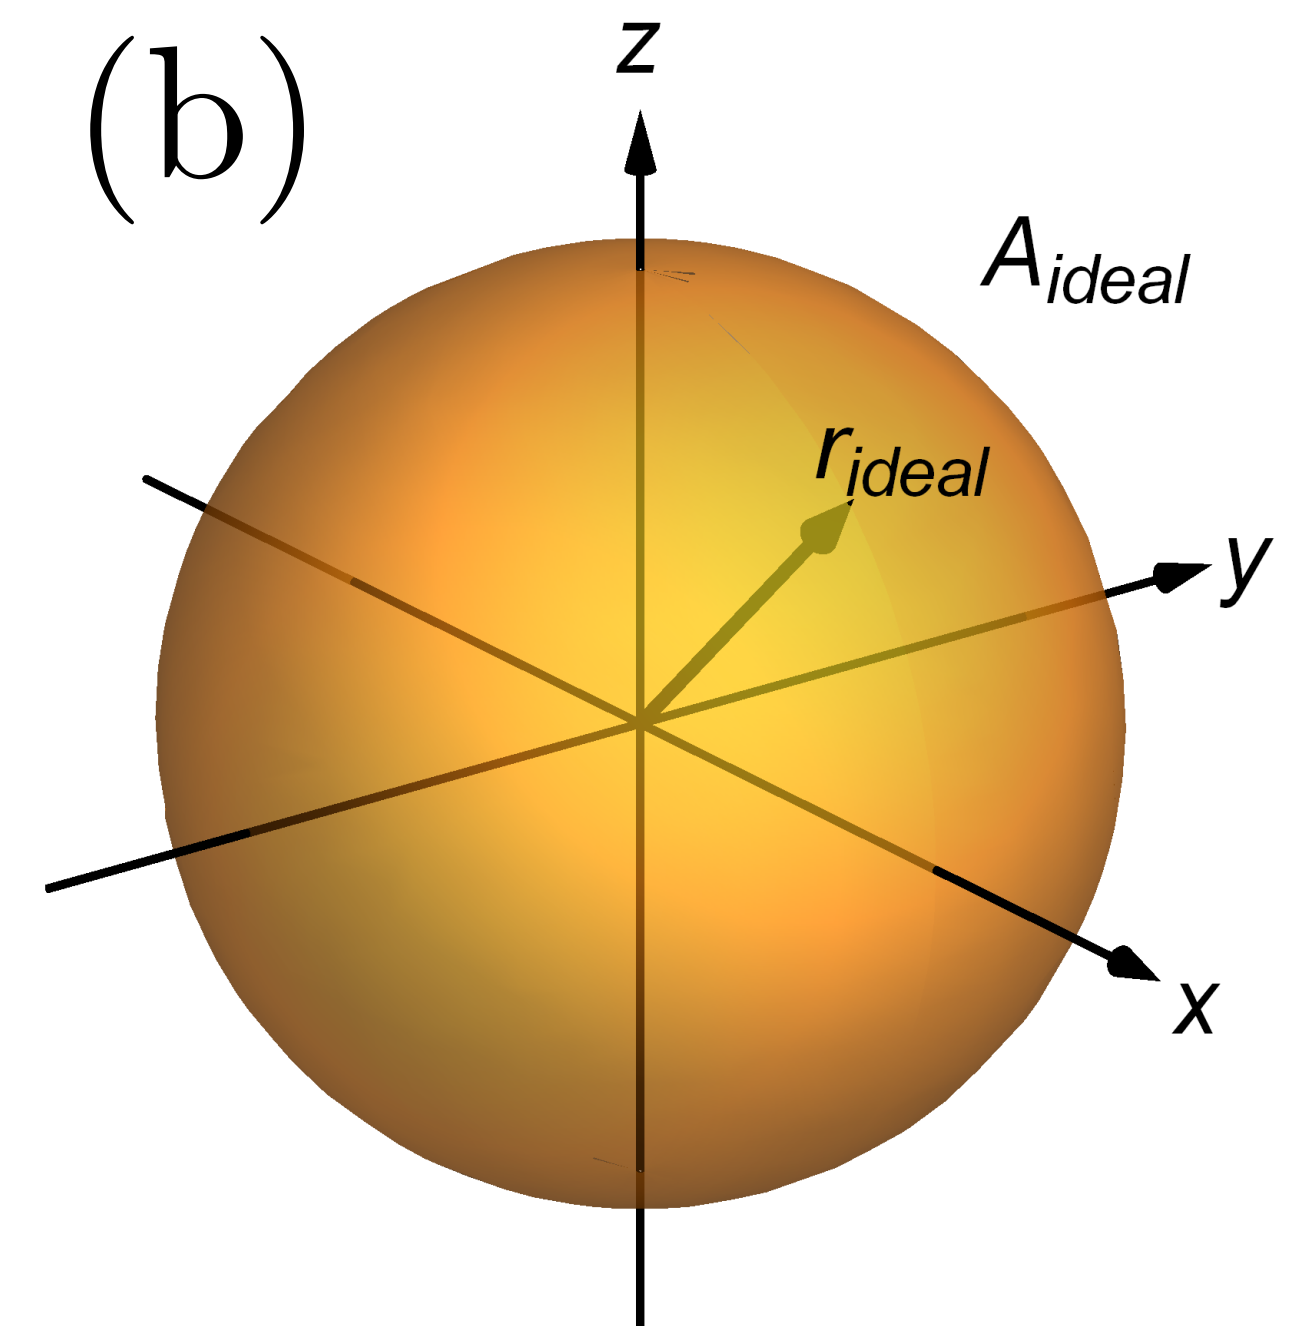

# A studied system

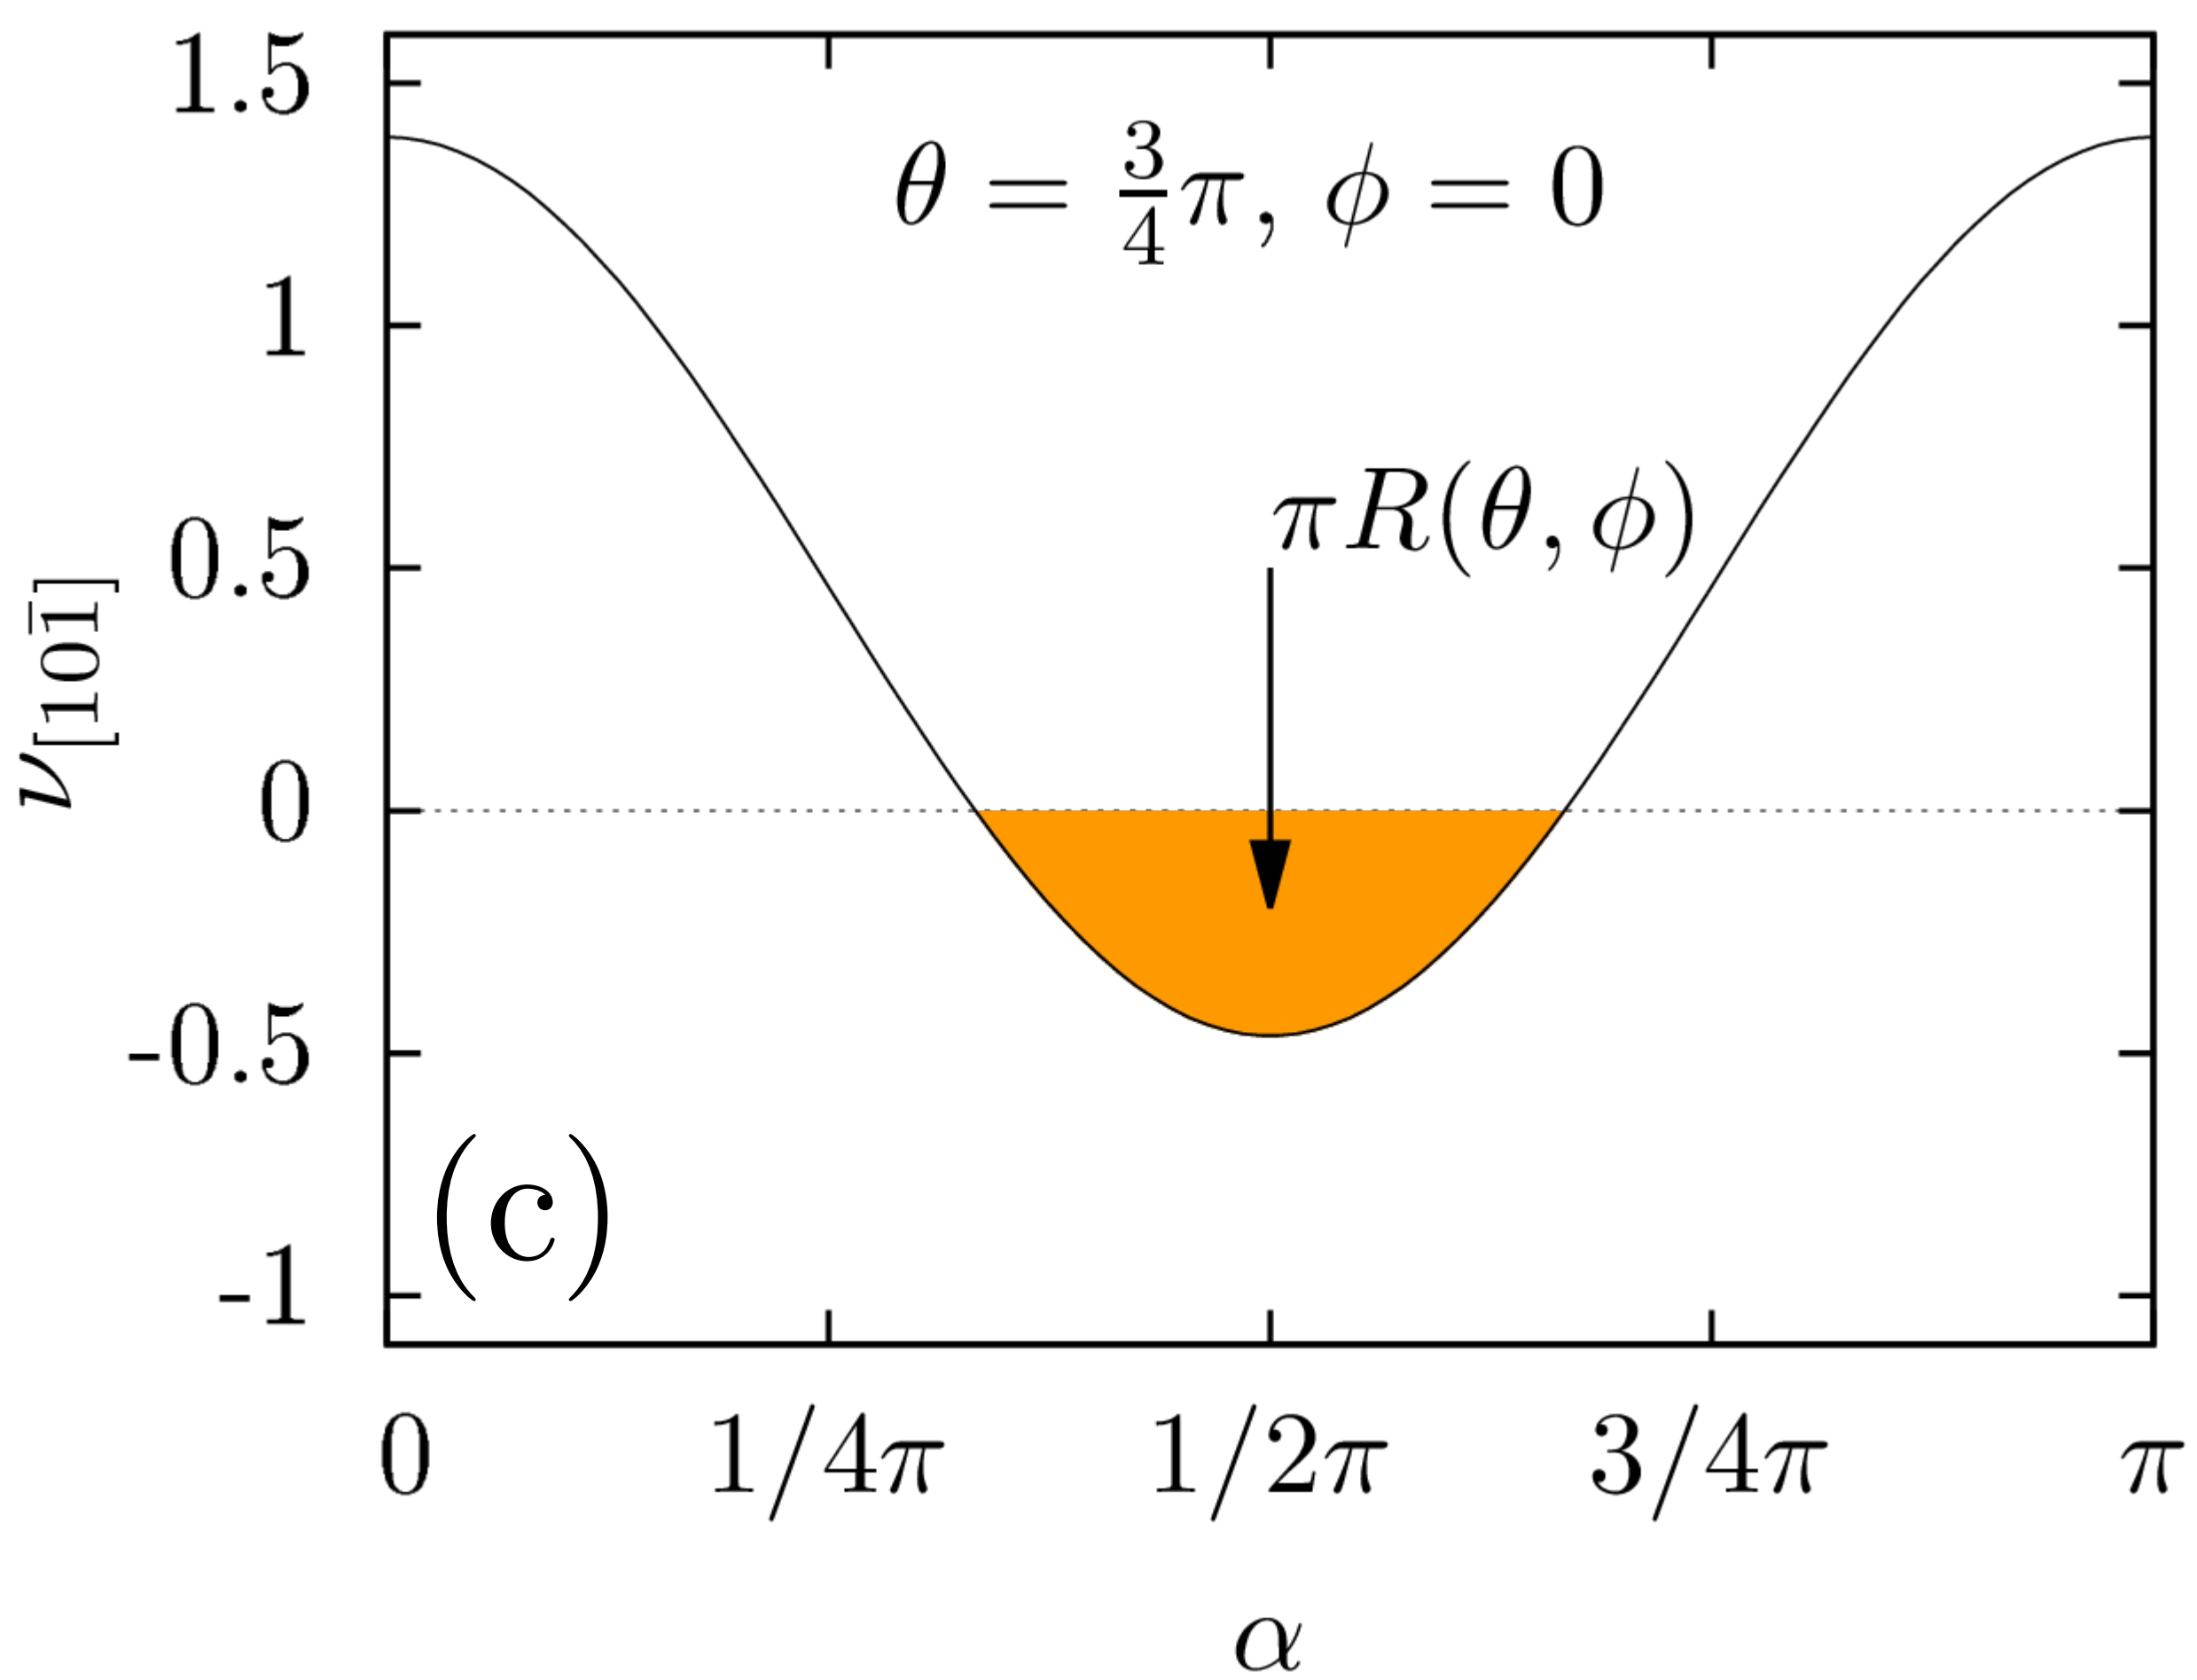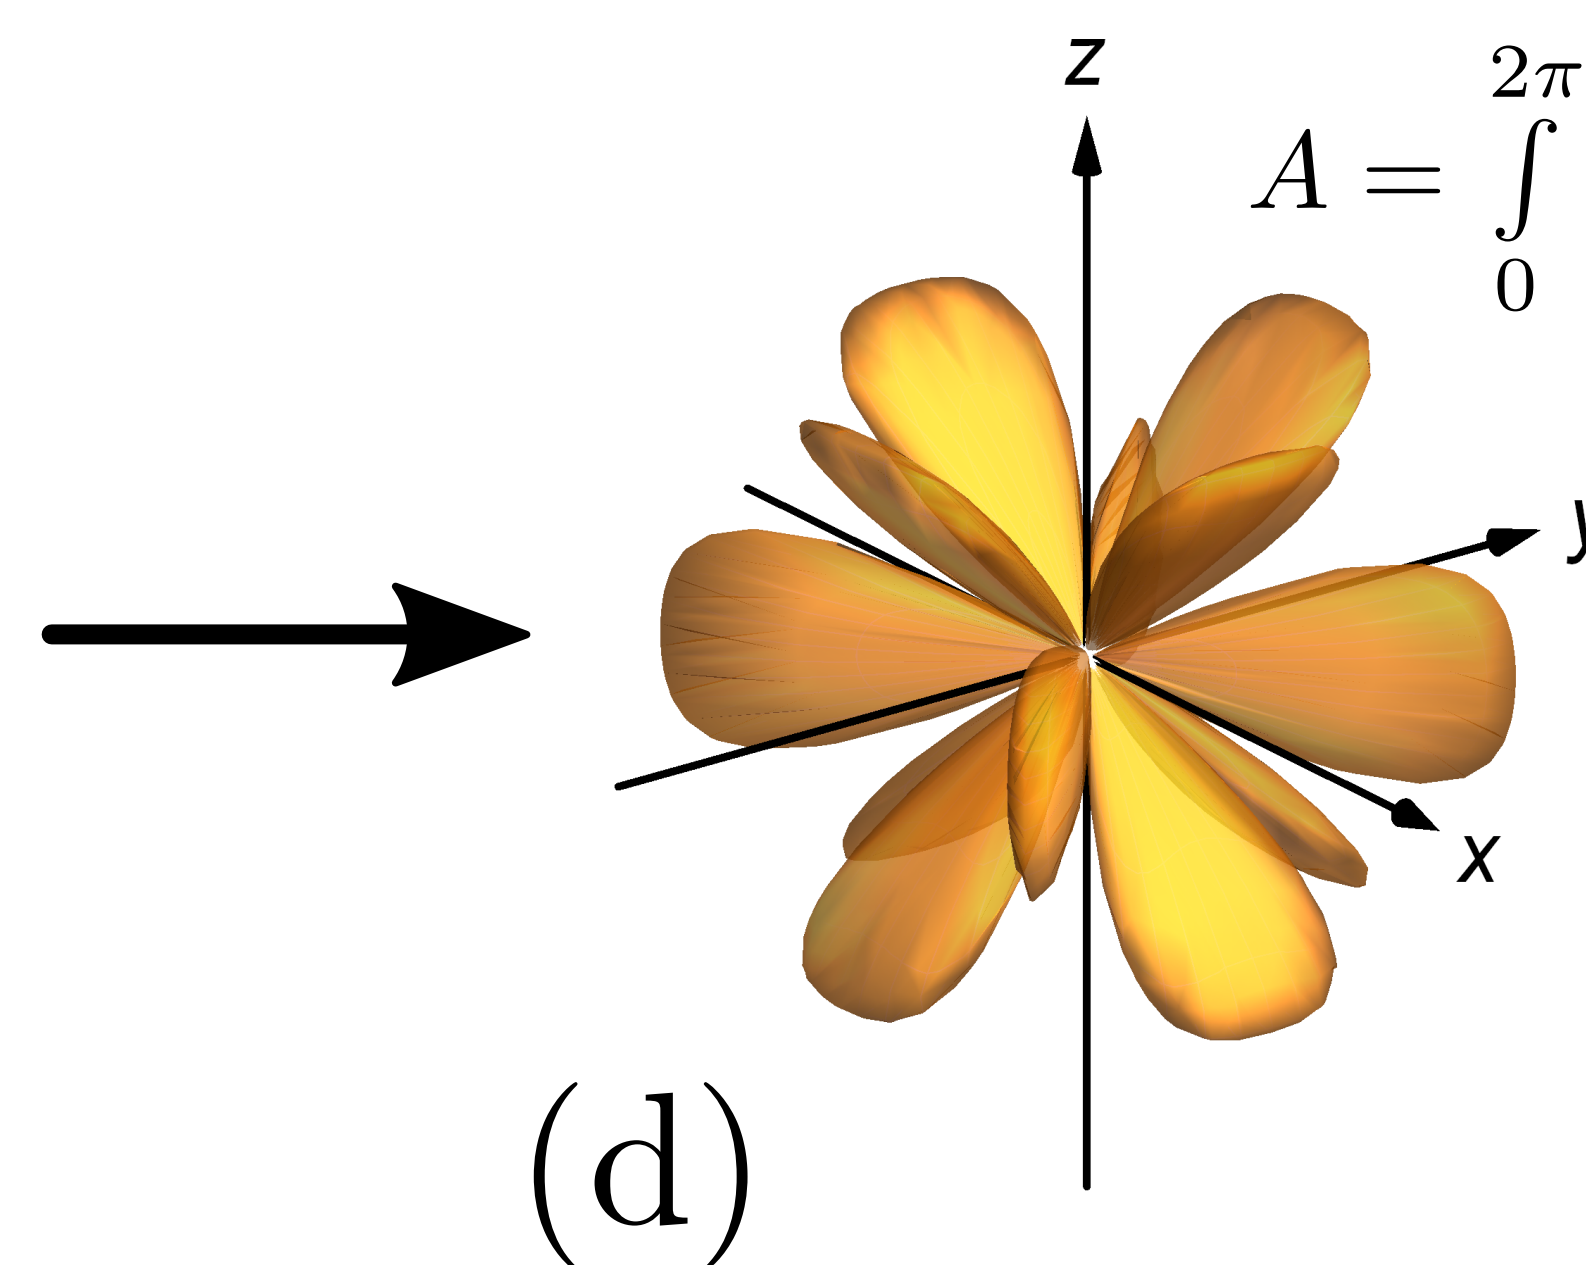

$$A = \int_0^{2\pi} d\phi \int_0^\pi \sin \theta d\theta \int_0^{R(\theta, \phi)} r^2 dr$$

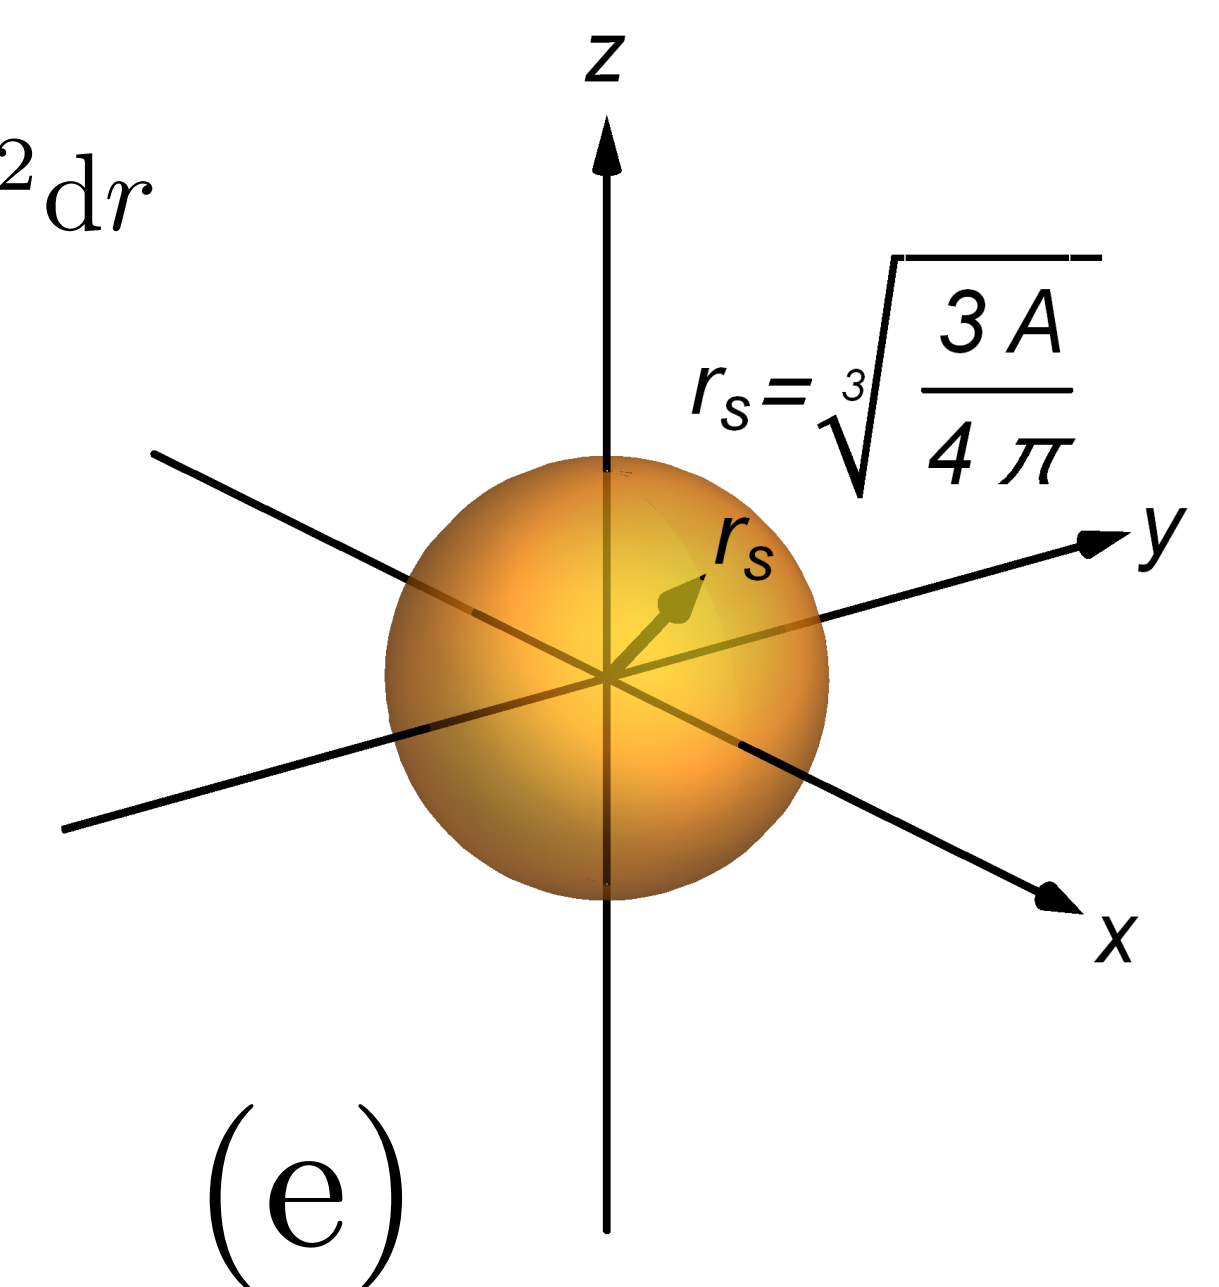

Supplement: c7sm01231d1.zip [file c7sm01231d1.zip]

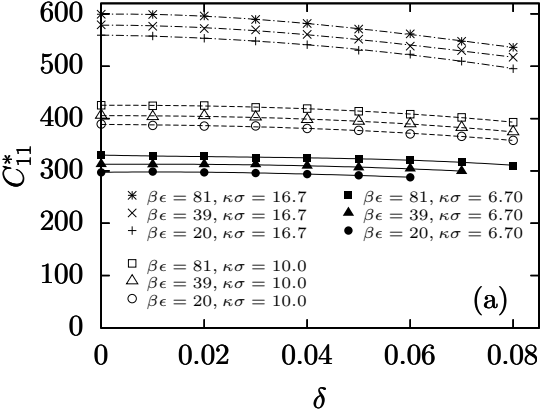

Supplement: c7sm01231d1.zip [file c7sm01231d1.zip]

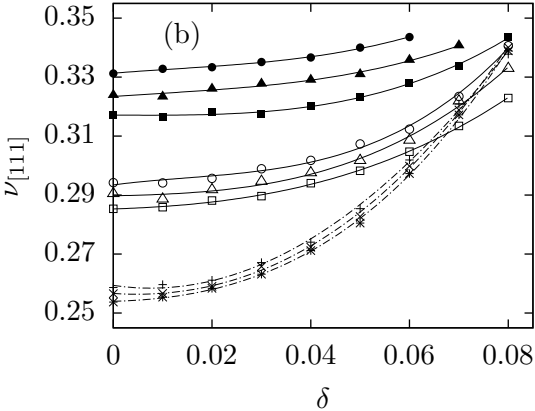

Supplement: c7sm01231d1.zip [file c7sm01231d1.zip]

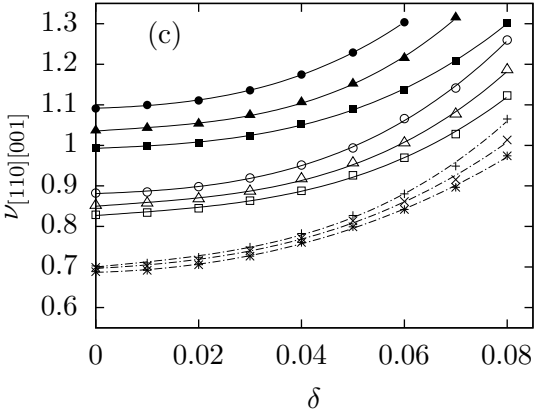

Supplement: c7sm01231d1.zip [file c7sm01231d1.zip]
